# Supplementary material for: An enzyme-free electrochemiluminescence insulin probe based on the regular attachment of ZnO nanoparticles on a 3-D nickel foam and H2O2 as an efficient co-reactant
Source: Royal Society of Chemistry journal article supplement (doi:10.1039/d0ay02071k), 2021-01-01
Supplement: d0ay02071k1.pdf [file d0ay02071k1.pdf]

## Supporting Information (SI)

Enzyme-free electrochemiluminescence Insulin probe based on regular attachment of ZnO nanoparticles on 3-D Nickel foam and  $\text{H}_2\text{O}_2$  as an efficient co-reactant

Mohammad Ali Kamyabi,\* Zahra Alipour, Mohsen Moharramnezhad

Electroanalytical Chemistry Laboratory, Department of Chemistry, Faculty of Science, University of Zanzan, Postal Code 45371-38791, Zanzan, Iran

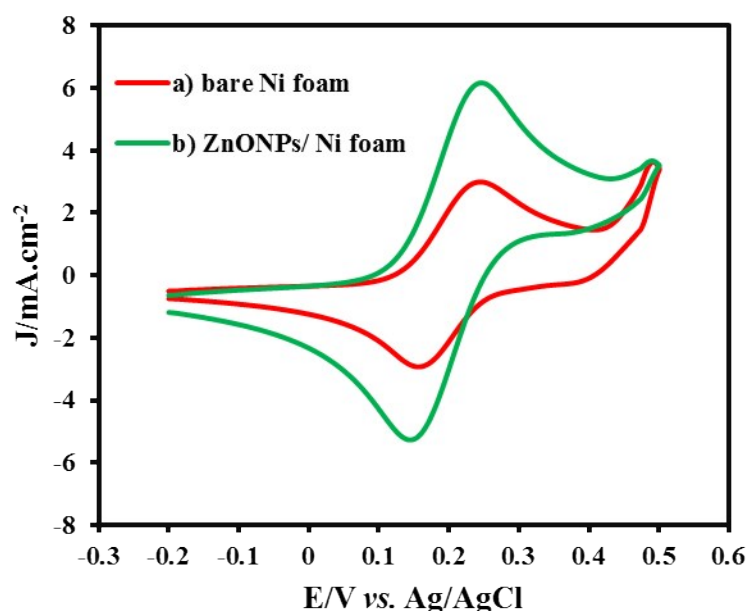

**Fig.S1.** The CV behavior of bare Ni foam (red line) and ZnONPs/Ni foam (green line) in 0.1 M buffer phosphate solution pH 7.4 containing 1.0 mM  $\text{K}_3\text{Fe}(\text{CN})_6$  at the scan rate of 100 mV/s.
